# Supplementary material
Source: PubMed Central journal article supplement (PMC7803941)
Supplement: mmc1.pdf [file mmc1.pdf]

## Age and Sex Disparities in Adherence to CPAP

*Sanjay R. Patel, MD; Jessie P. Bakker, PhD; Christy J. Stitt, MS; Mark S. Aloia, PhD; and S. Mehdi Nouraie, PhD*

CHEST 2021; 159(1):382-389

*Online supplements are not copyedited prior to posting and the author(s) take full responsibility for the accuracy of all data.*

© 2020 AMERICAN COLLEGE OF CHEST PHYSICIANS. Reproduction of this article is prohibited without written permission from the American College of Chest Physicians. See online for more details. DOI: 10.1016/j.chest.2020.07.017

**e-Figure 1: CPAP adherence rates by age and gender in patients with a high quality durable medical equipment provider**

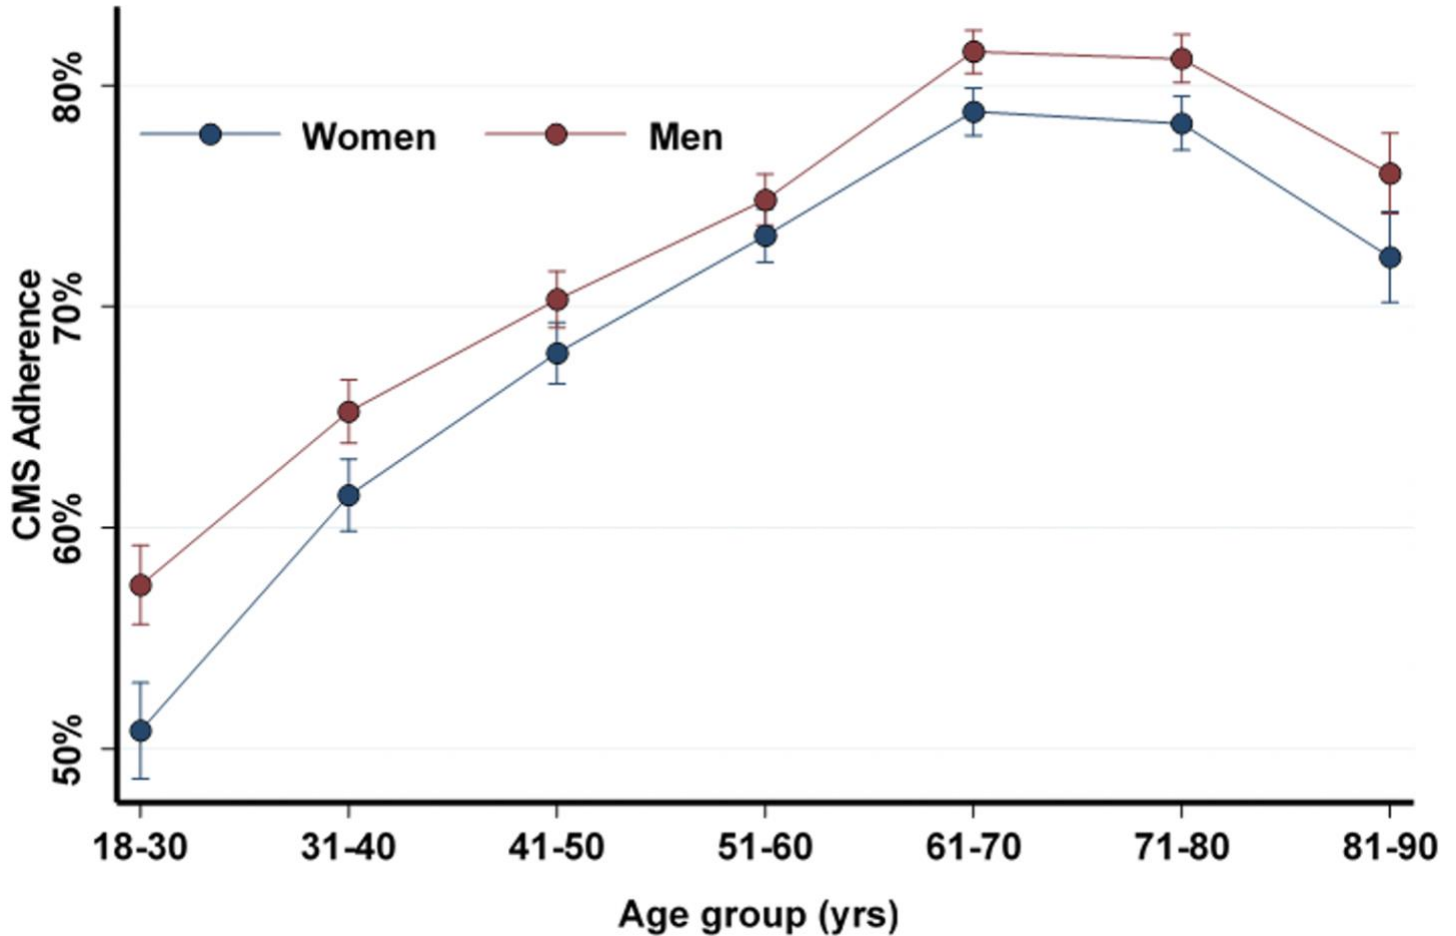

The proportion of patients meeting CMS criteria (4 or more hours of use per night on 70% of nights in a consecutive 30-day period within the first 90 days) for long term CPAP coverage by age group plotted separately for men and women among the 221,471 patients treated by one of 323 durable medical equipment companies who had less than 10% rate of missing demographic data. Error bars display 95% confidence intervals. Results displayed are the output from mixed effects logistic regression models accounting for durable medical equipment provider. CMS: Centers for Medicare & Medicaid Services; CPAP: continuous positive airway pressure.

e-Figure 2: Proportion of low CPAP adherers by age and gender

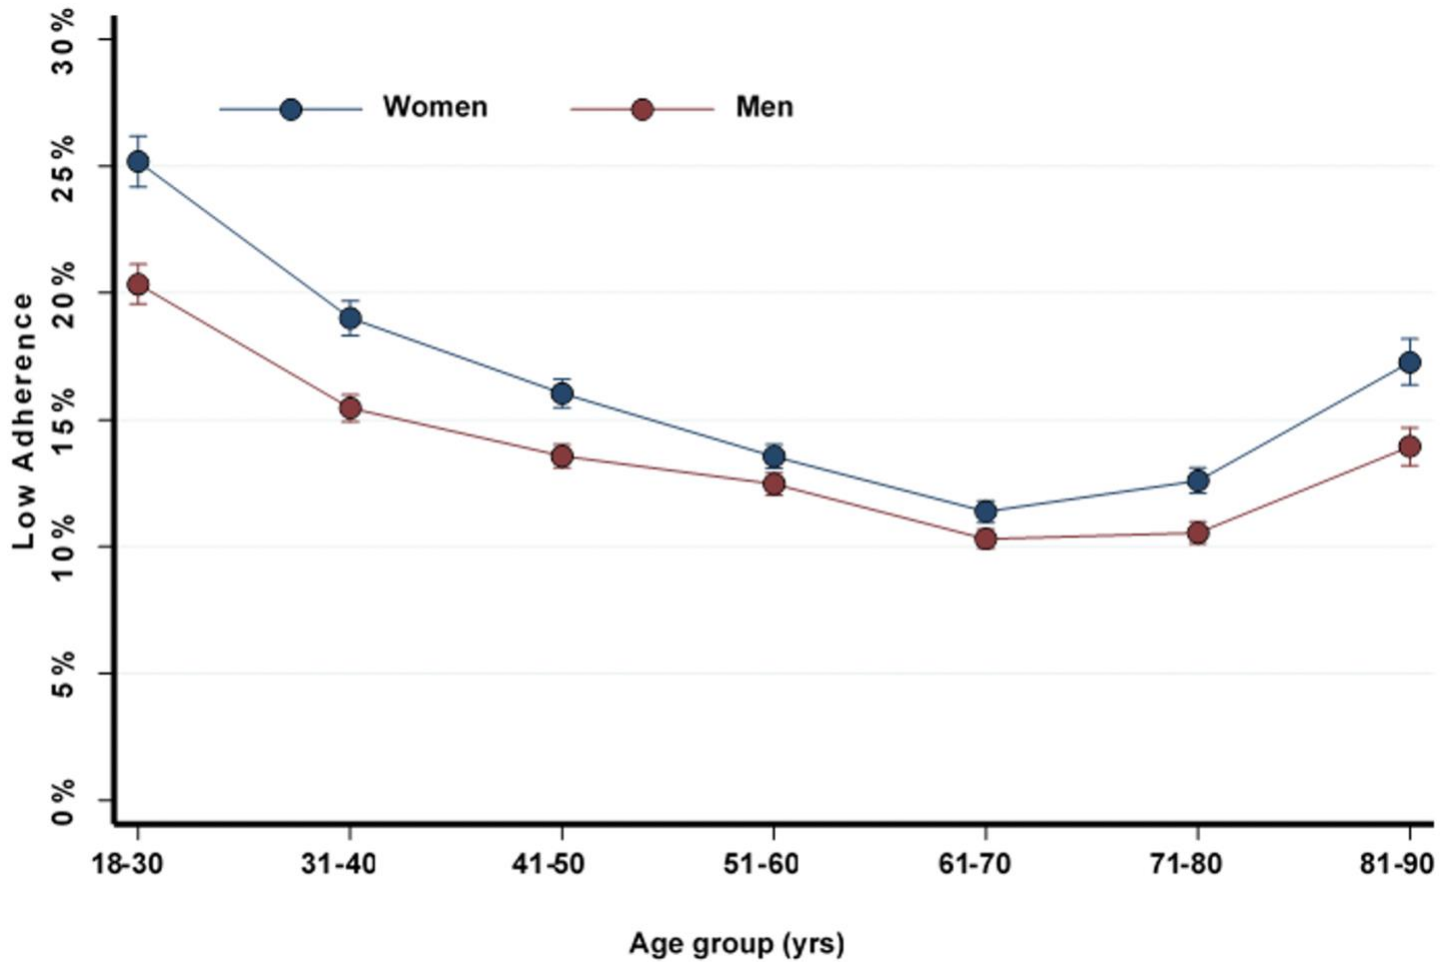

The proportion of patients with low adherence defined as mean CPAP use < 1 hour/night at 90-days by age group plotted separately for women and men. Error bars display the 95% confidence intervals. Results displayed are the output from mixed effects linear regression models accounting for durable medical equipment provider. CPAP: continuous positive airway pressure.

**e-Figure 3: Average nightly CPAP use by day of week in patients with a high quality durable medical equipment provider**

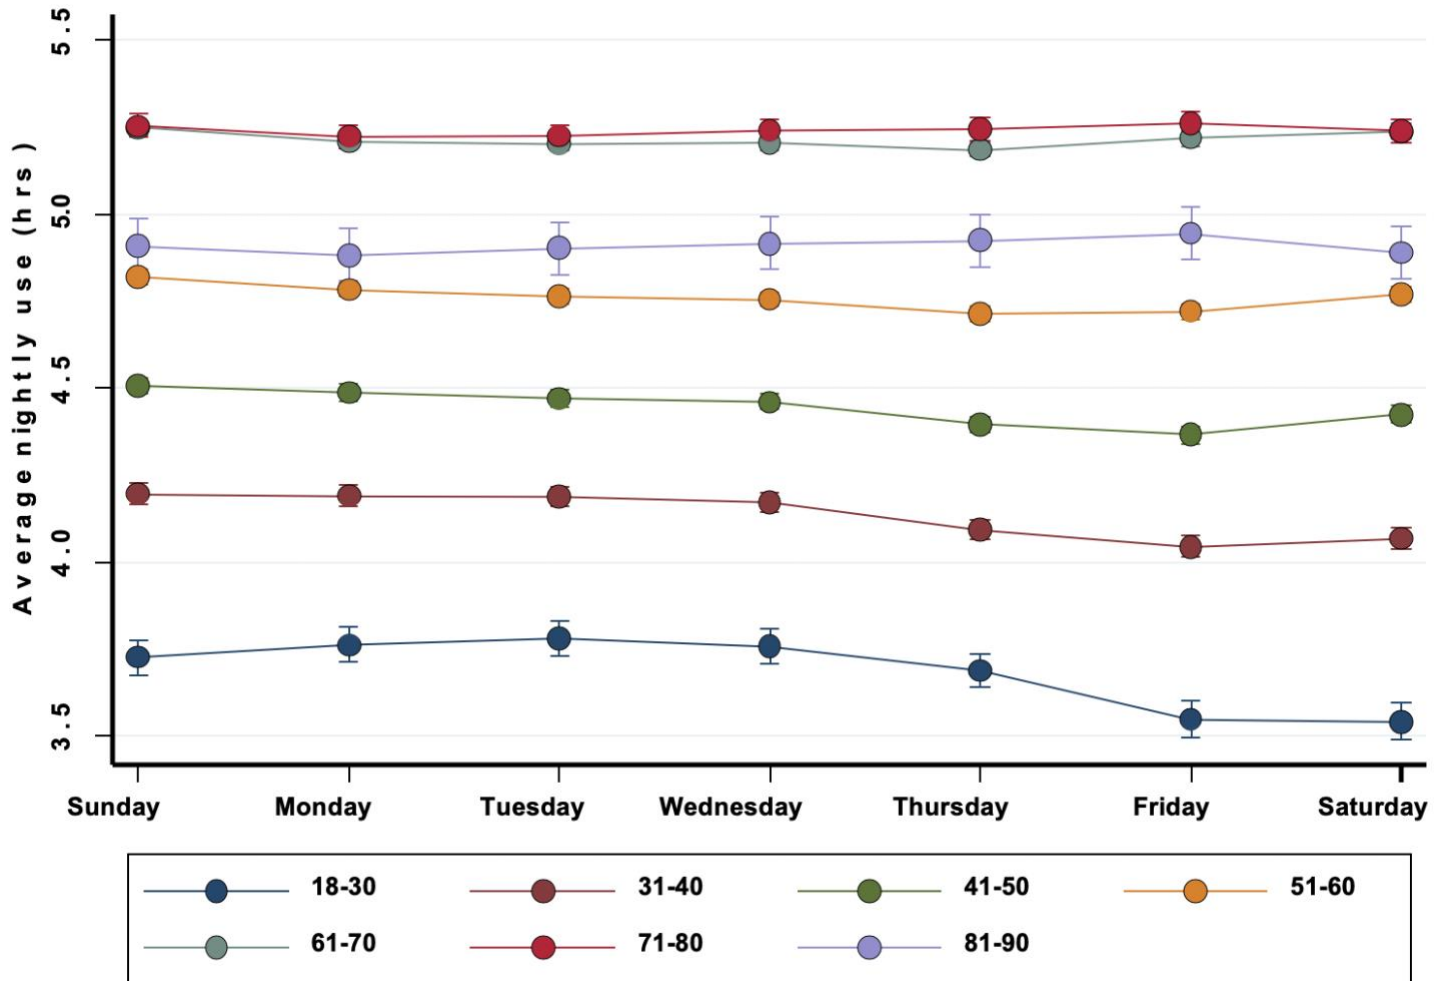

Mean nightly use (hours) of CPAP over the first 90-days by day of the week plotted by age category among the 221,471 patients treated by one of 323 durable medical equipment companies who had less than 10% rate of missing demographic data. Error bars display the 95% confidence intervals. Results displayed are model estimates accounting for within-subject clustering. CPAP: continuous positive airway pressure.

**e-Figure 4: Non-use of CPAP by day of week in patients with a high quality durable medical equipment provider**

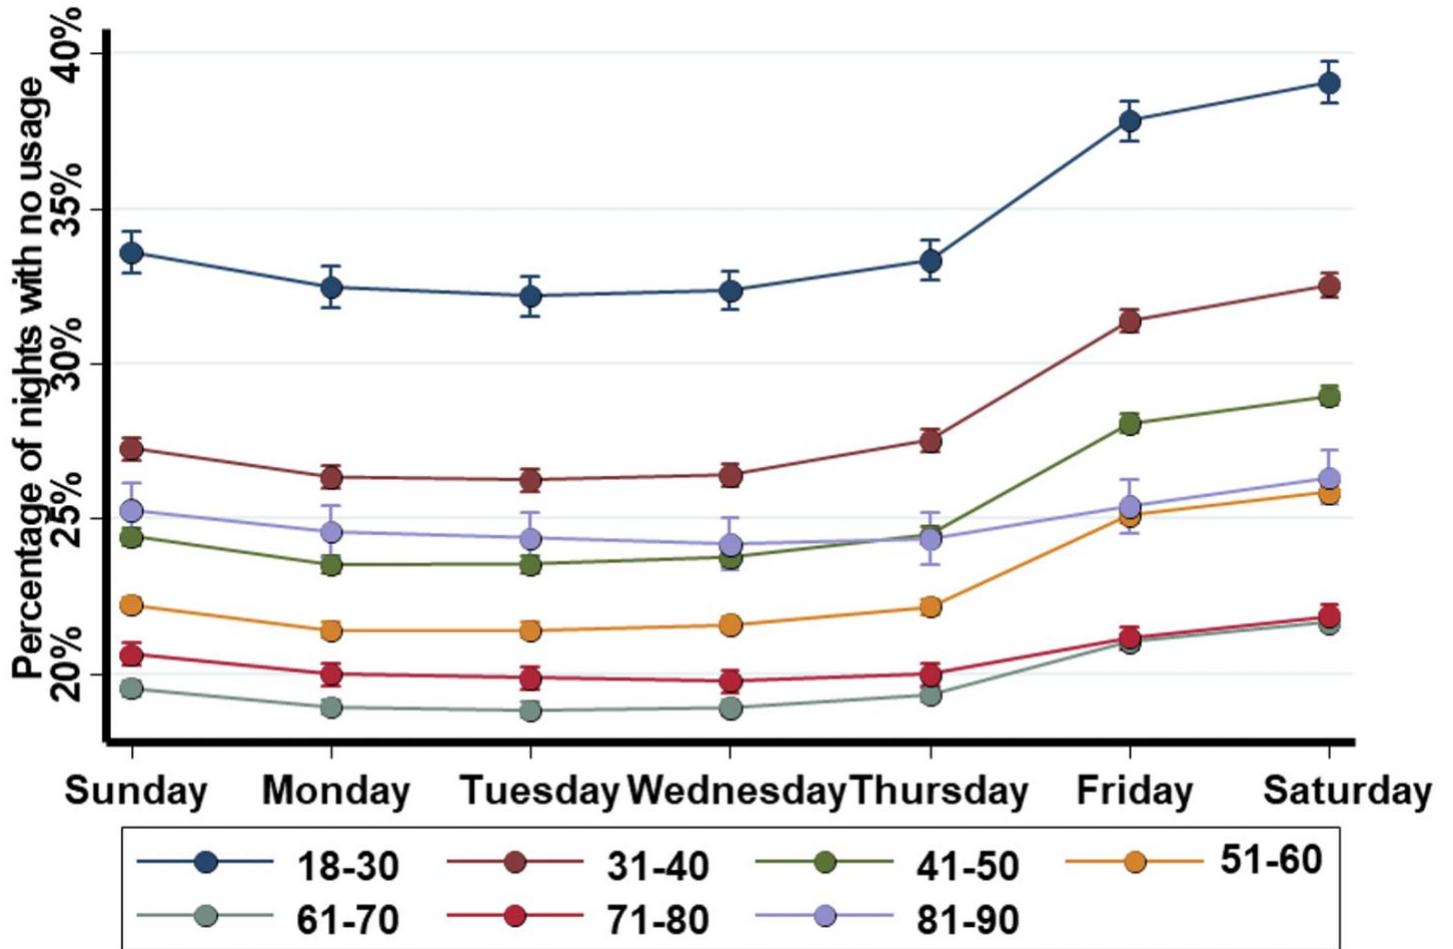

Percentage of nights where CPAP was not used over the first 90-days by day of the week plotted by age category among the 221,471 patients treated by one of 323 durable medical equipment companies who had less than 10% rate of missing demographic data. Error bars display the 95% confidence intervals. Results displayed are model estimates accounting for within-subject clustering. CPAP: continuous positive airway pressure.
